# Supplementary material for: TRPV4 channels are essential for alveolar epithelial barrier function as protection from lung edema
Source: JCI Insight. 2020 Oct 15;5(20):e134464. doi: 10.1172/jci.insight.134464 (PMC7605532; doi:10.1172/jci.insight.134464)
Supplement: supplemental data [file jciinsight-5-134464-s164.pdf]

## Supplemental Figures

### TRPV4 channels are essential for alveolar epithelial barrier function as protection from lung edema

Jonas Weber, Suhasini Rajan, Christian Schremmer, Yu-Kai Chao, Gabriela Krasteva-Christ, Martina Kannler, Ali Önder Yildirim, Monika Brosien, Johann Schredelseker, Norbert Weissmann, Christian Grimm, Thomas Gudermann, Alexander Dietrich

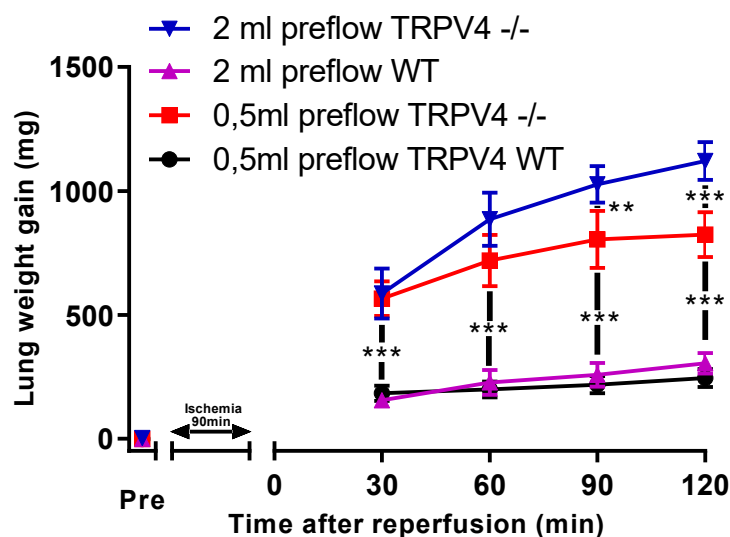

**Supplemental Figure 1. Constant weight measurements of ischemic WT and TRPV4-/- isolated perfused lungs after applying preflows (Pre) of different velocities (0.5 ml versus 2ml).** Significance between means was analyzed using two way ANOVA and indicated as \*\*\* for  $p < 0.001$  and \*\* for  $p < 0.01$ . Ablation of TRPV4 increases ischemia-induced edema formation in mouse lungs.

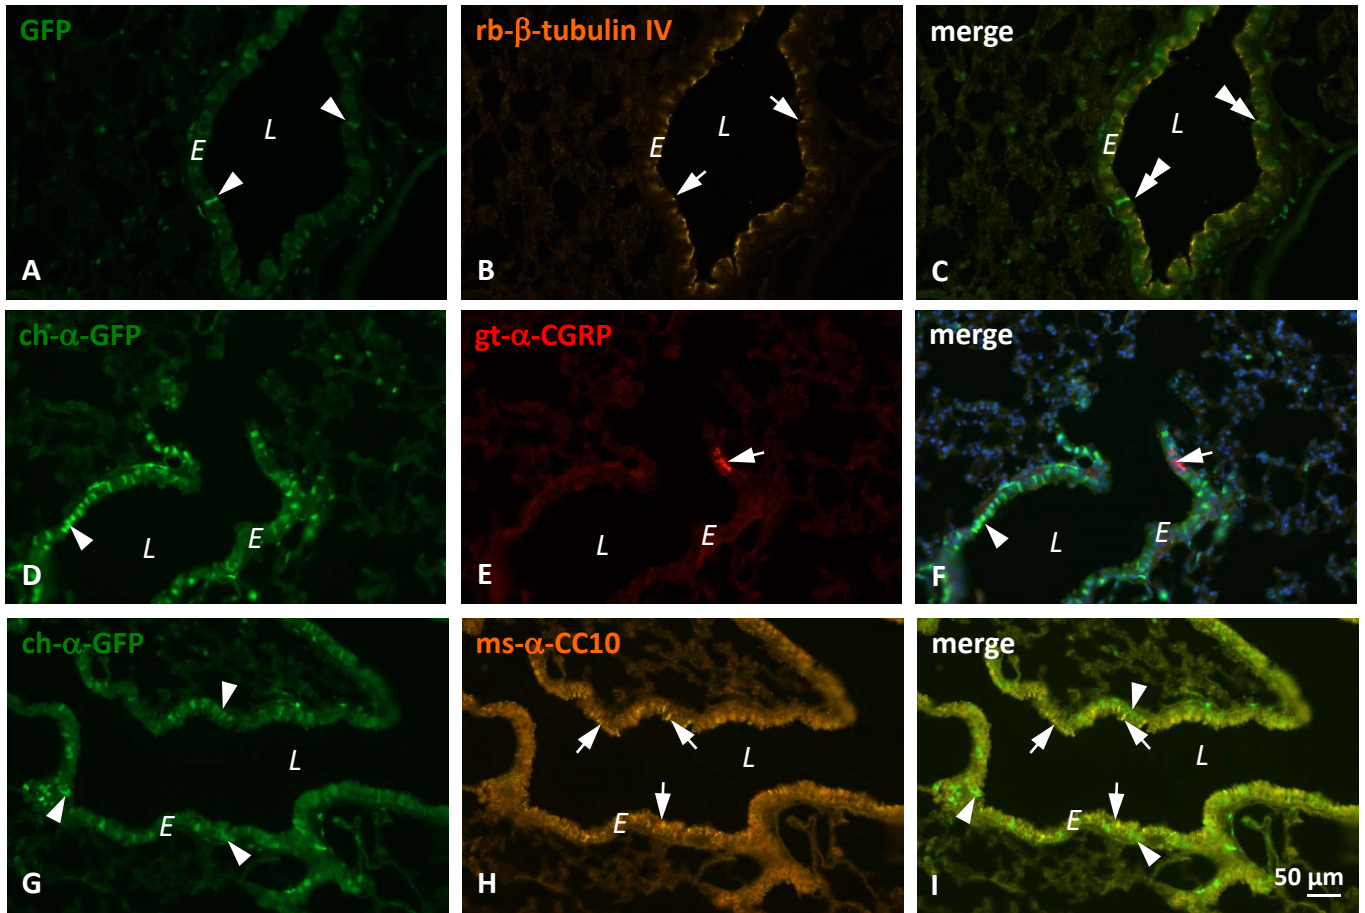

**Supplemental Figure 2.** Localization of TRPV4 in mouse lungs using immunohistochemistry. *L* = bronchial lumen, *E* = epithelial layer, scale bars = 50  $\mu$ m. (A) Lung cryosections of TRPV4-eGFP reporter mice revealed expression of TRPV4 (arrowheads) in a subpopulation of bronchial epithelial cells. (B). Ciliated cells were labeled for  $\beta$ -tubulin IV (arrows). (C) A merged view of images shown in A and B. TRPV4eGFP-positive cells are positive for  $\beta$  tubulin IV (double arrowheads, A-C). D-F) TRPV4eGFP-fluorescence was enhanced using an anti-GFP-antibody. The same distribution pattern of TRPV4eGFP-immunoreactive cells (arrowheads, D-F) was observed. Neuroepithelial bodies labeled by anti-CGRP-antiserum (arrows, E-F) were not immunoreactive for TRPV4eGFP (merge, F). (G-I) TRPV4eGFP-immunoreactive cells (arrowheads, G) were not labeled for CC10 (arrows, H-I), a marker for club cells.

**A**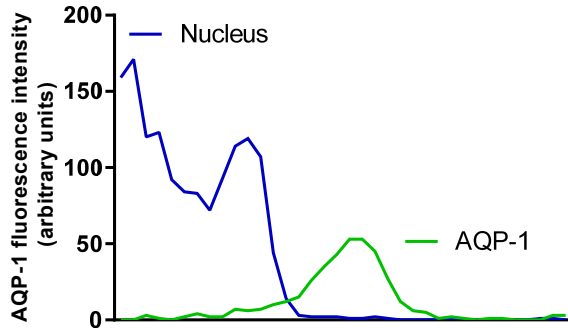**B**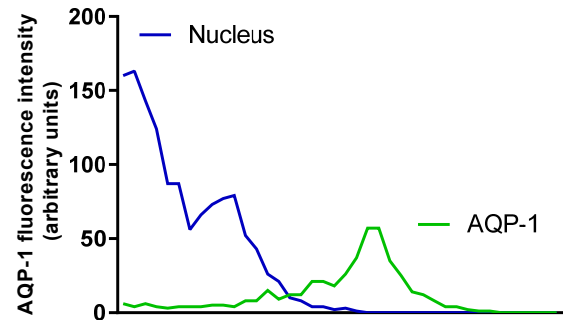**C**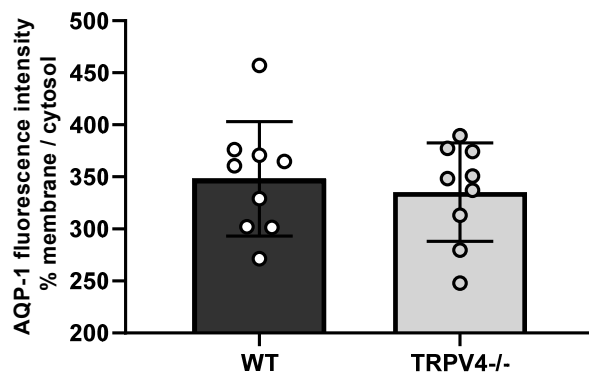**D**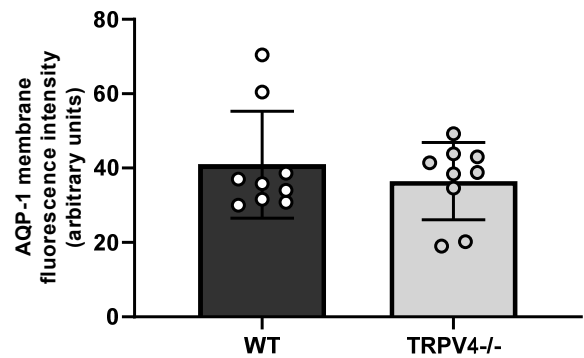

**Supplemental Figure 3. Aquaporin-1 (AQP-1) expression and translocation to the plasma membrane in WT and TRPV4<sup>-/-</sup> endothelial cells.** Representative histograms for the quantification of AQP-1 protein in the plasma membrane of WT (**A**) and TRPV4-deficient endothelial cells (**B**). Summaries of AQP-1 protein expression in plasma membranes (% AQP-1 in membranes (**C**)) and in relation to the cytosol (% AQP-1 membrane/cytosol (**D**)). Data represent means  $\pm$  SEM from 9 lungs. No significance between means was identified using two tailed unpaired Student's t-test.

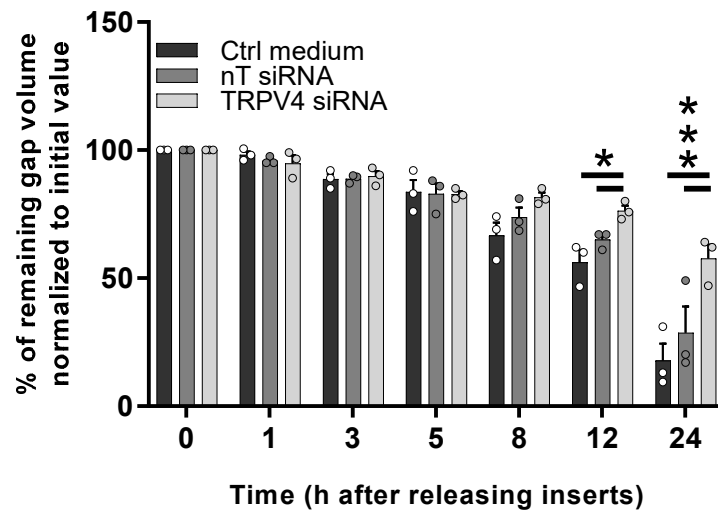

**Supplemental Figure 4. Migration of ATI cells expressing TRPV4 siRNA.** Summary of remaining gap values normalized to initial values quantified in migration assays of WT ATI cells (control (ctrl) medium) as well as ATI cells transfected with siRNA (non-targeting (nT siRNA) or TRPV4-specific siRNAs (TRPV4 siRNA)) after removing inserts at 0, 1, 3, 5, 8, 12 and 24 h. Data represent means  $\pm$  SEM from 3 independent cell preparations of 5 mice each. Significance between means was analyzed using two way ANOVA and indicated as \*\*\* for  $p < 0.001$  and \* for  $p < 0.05$ .
